# Supplementary material for: Clinico-Pathological Correlation of β-Catenin and Telomere Dysfunction in Head and Neck Squamous Cell Carcinoma Patients
Source: PubMed Central journal article supplement — J Cancer. 2015 Jan 15;6(2):192–202. doi: 10.7150/jca.9558 (PMC4314668; doi:10.7150/jca.9558), 2015-01-15

**Figure S1:** Western blot showing protein expression in the cut margin and tumor samples of the respective four antibodies ( $\beta$ -catenin, TRF2, and hTERT) for 33 cases and  $\beta$ -catenin protein expression in the cut margin and tumor samples for additional 34 cases.

**Figure S2:** Immunohistochemistry images showing protein expression cut margin and tumor samples of the respective antibodies ( $\beta$ -catenin, TRF2) for 33 cases.

Fig. S1

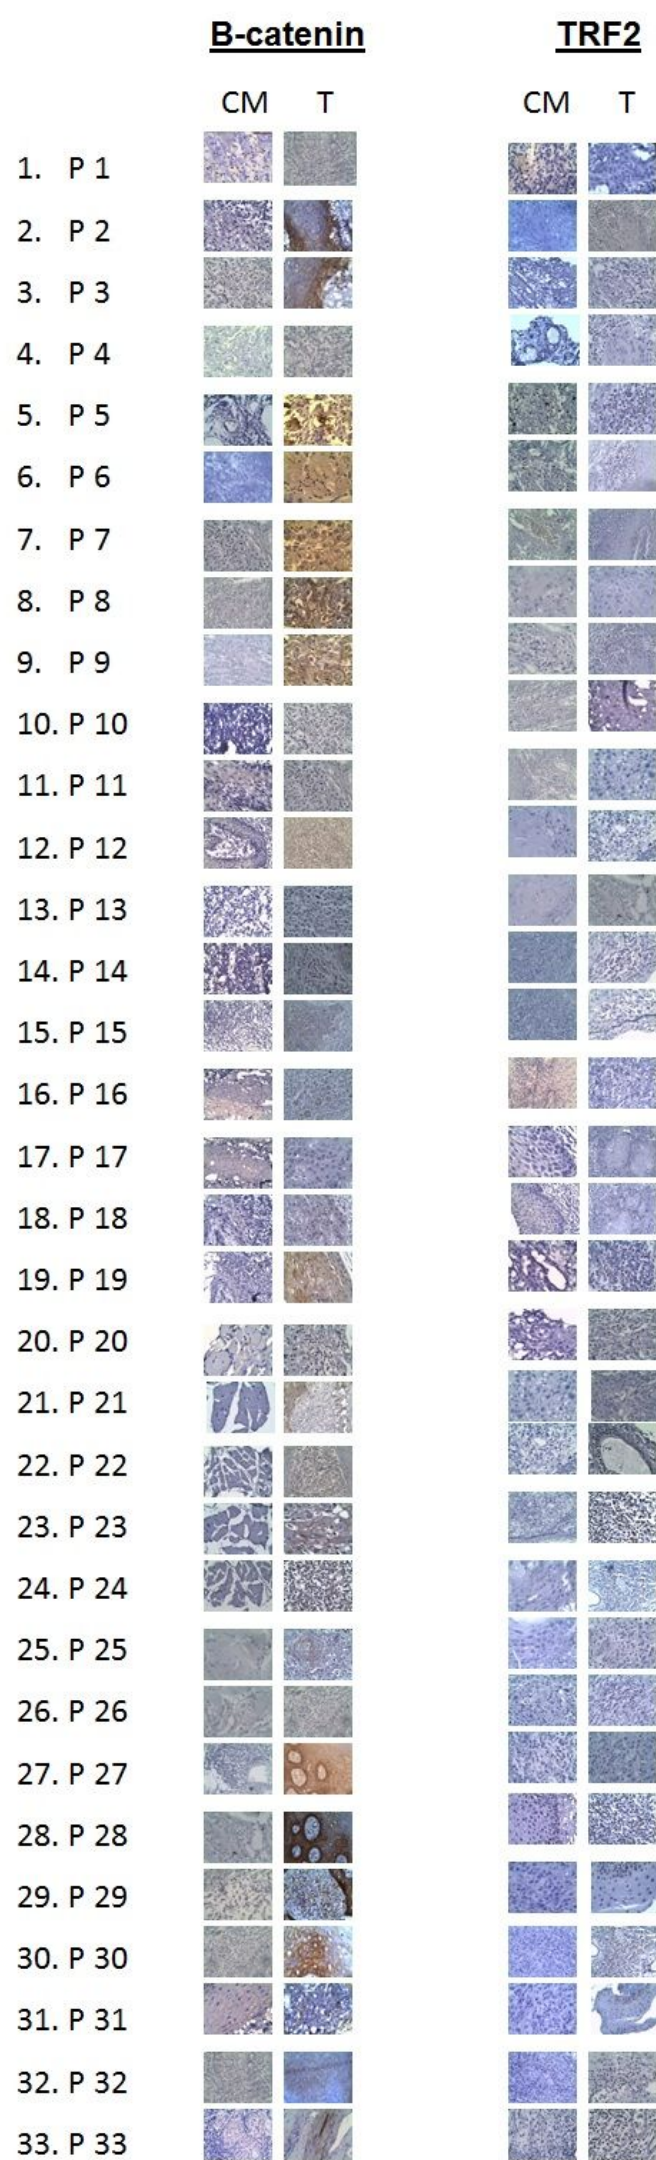

Fig. S2

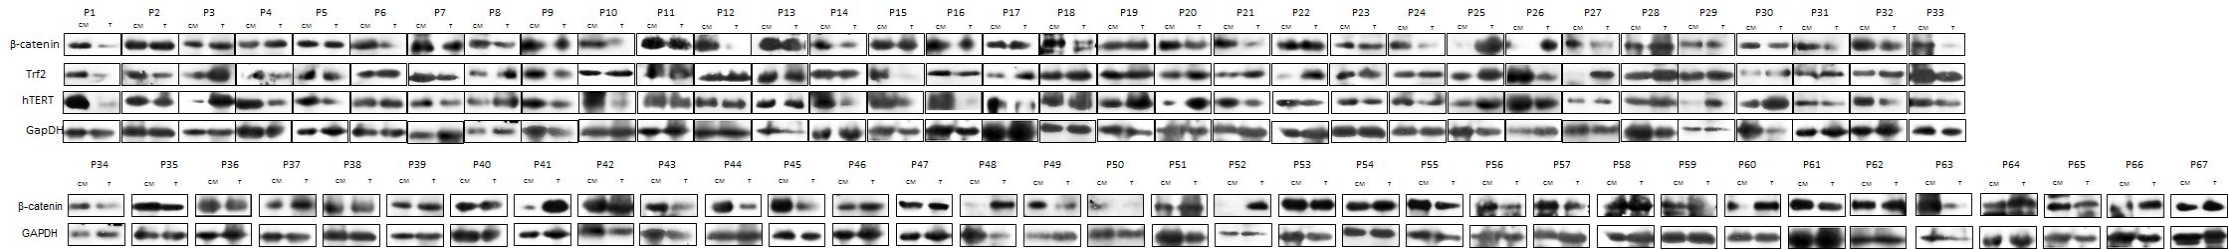

Supplement: jcav06p0192s2.pdf [file jcav06p0192s2.pdf]
